# Supplementary material for: Simultaneous regeneration of epithelial and bone tissue using a multifunctional film with leaf-stacked structures and growth factors
Source: Royal Society of Chemistry journal article supplement (doi:10.1039/d5bm01644d), 2025-12-19
Supplement: d5bm01644d1.pdf [file d5bm01644d1.pdf]

**Supplementary Information for**

**Simultaneous regeneration of epithelial and bone tissue using a  
multifunctional film with leaf-stacked structure and growth  
factors**

**Ho Yong Kim<sup>†a</sup>, Han Byul Kim<sup>†a</sup>, Jin-Ho Park<sup>b,c</sup>, Min Ji Kim<sup>a</sup>, June-Ho Byun<sup>\*d</sup>,  
and Se Heang Oh<sup>\*\*a,e</sup>**

*<sup>a</sup>Department of Nanobiomedical Science, Dankook University, Cheonan, 31116, Republic of Korea*

*<sup>b</sup>Department of Biology, College of Natural Science, Kyungpook National University, Daegu, 41566, Republic of Korea*

*<sup>c</sup>School of Life Sciences, BK21 plus KNU Creative BioResearch Group, Kyungpook National University, Daegu, 41566, Republic of Korea*

*<sup>d</sup>Department of Oral and Maxillofacial Surgery, Gyeongsang National University School of Medicine, Gyeongsang National University Hospital, Institute of Health Science, Gyeongsang National University, Jinju, 52828, Republic of Korea*

*<sup>e</sup>Department of Biomedical Sciences & Biosystems, Dankook University, Cheonan, 31116, Republic of Korea*

†These authors contributed equally to this work.

\*Corresponding authors.

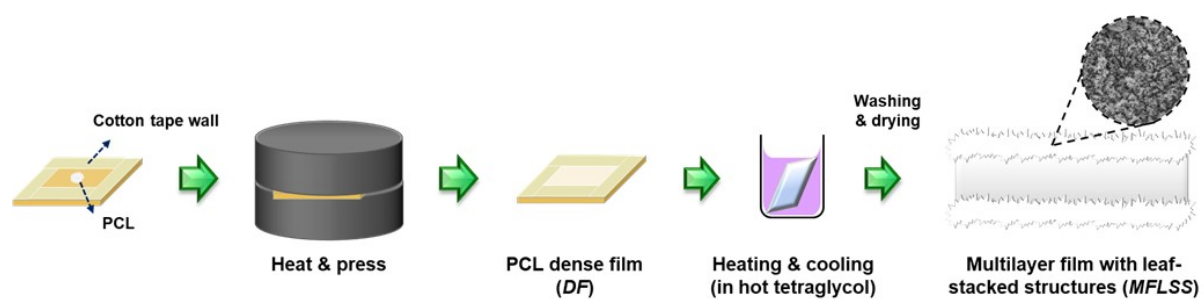

**Fig. S1.** Schematic diagram depicting the fabrication process of the multilayer film featuring leaf-stacked structures (*MFLSS*).

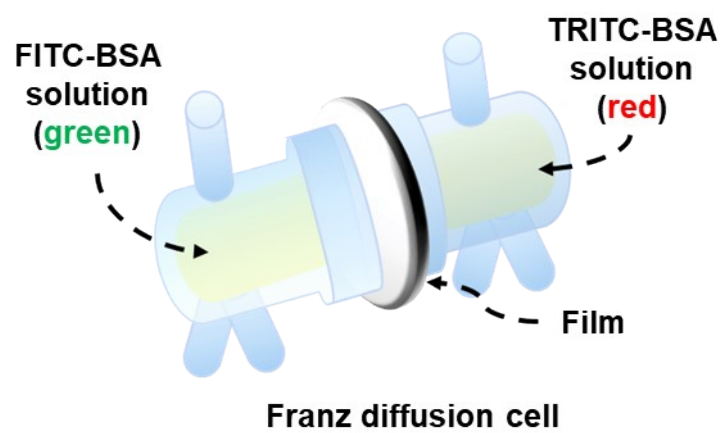

**Fig. S2.** Schematic diagram illustrating the procedure for loading proteins or growth factors onto the films (*DF* or *MFLSS*) using Franz diffusion cells.

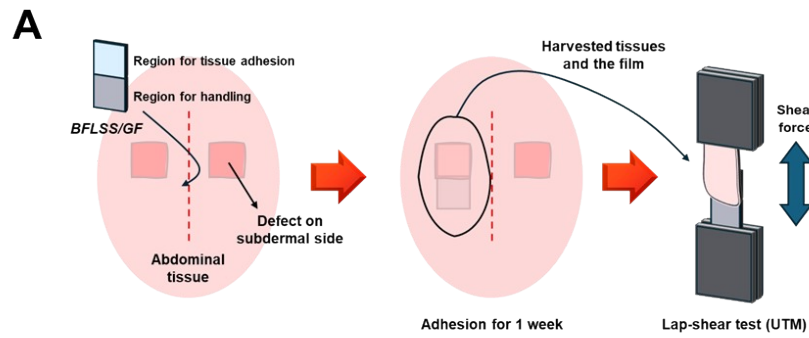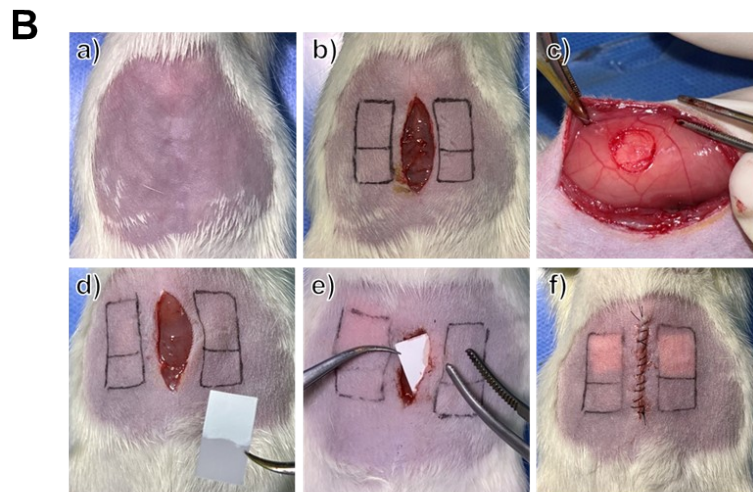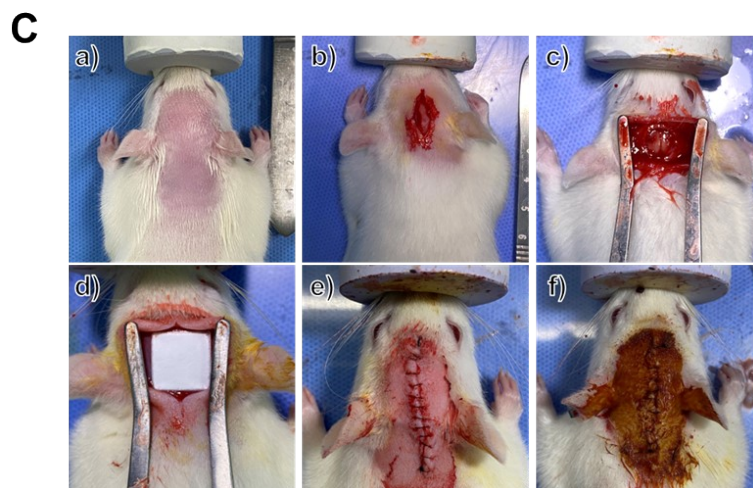

**Fig. S3.** (A) Schematic depiction of the *MFLSS/PDGF* used for the rat epithelium adhesion model and mechanical strength analysis (lap-shear test). (B) Overview of the rat epithelium adhesion model protocol and (C) experimental design for the rat calvarial defect model.

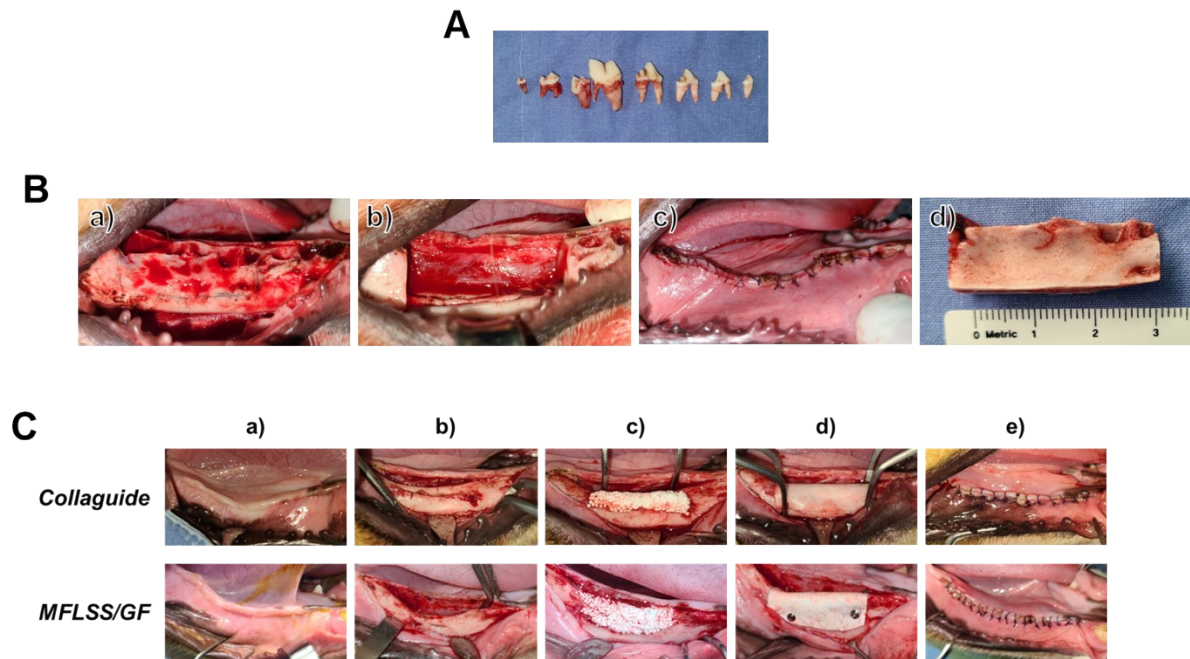

**Fig. S4.** Representative animal model setup and surgical procedures for *Collaguide* and *MFLSS/GF*. (A) The teeth ranging from the right mandibular first premolar to the last molar were extracted in Beagle dogs. (B) Following tooth extraction, a rectangular defect was generated using both reciprocating and sagittal saws. (C) 3 months post-osteotomy, bone grafting was conducted to address the defect utilizing bone substitutes and membrane application.

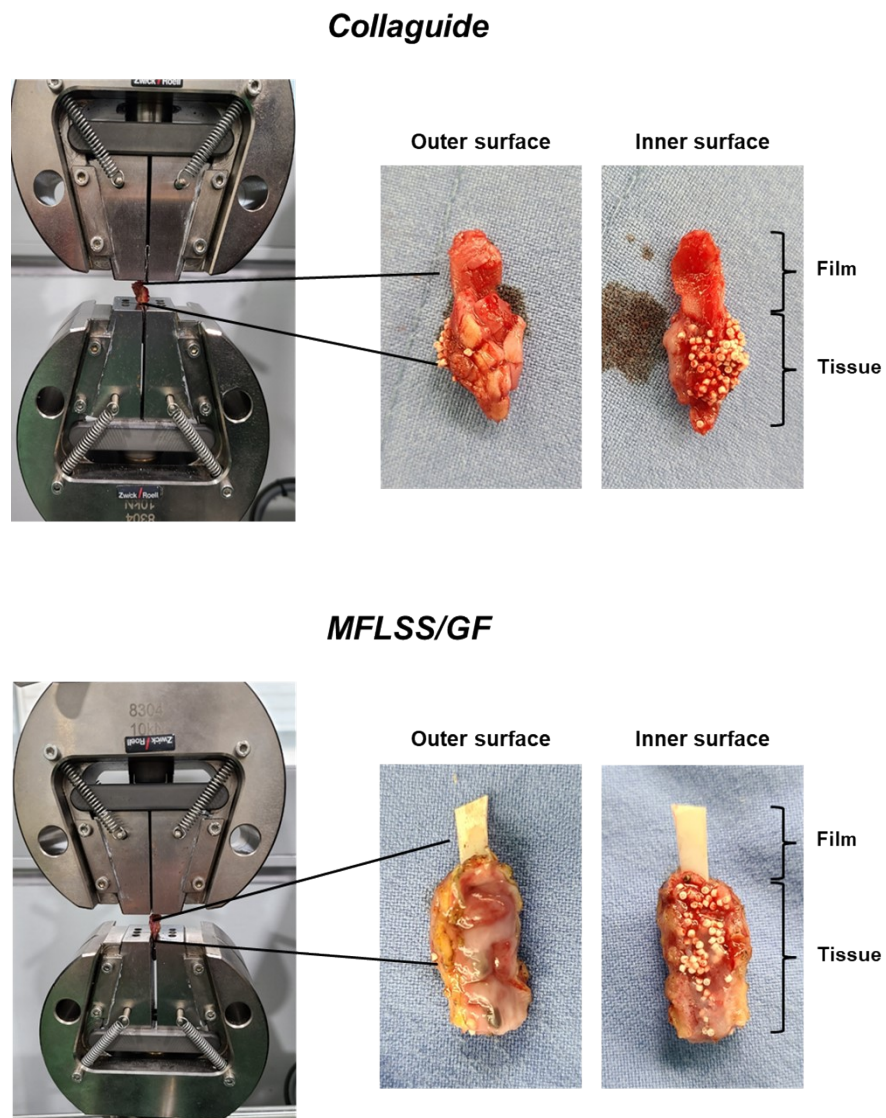

**Fig. S5.** Mechanical strength analysis (lap-shear test) of film-epithelial adhesion samples (*Collaguide* and *MFLSS/GF*).



***DF***

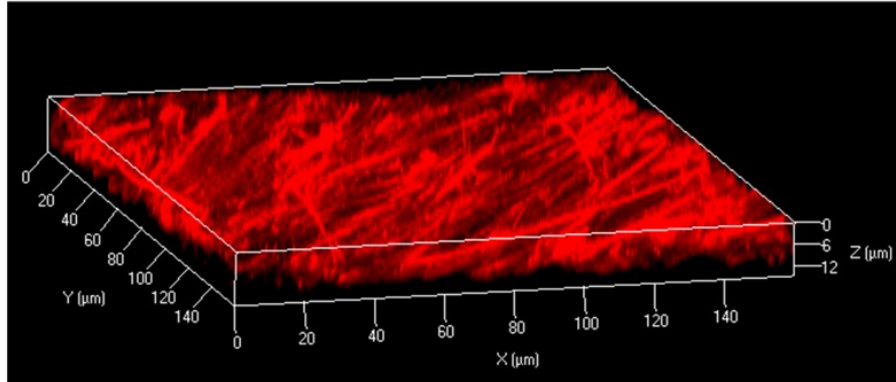

***MFLSS***

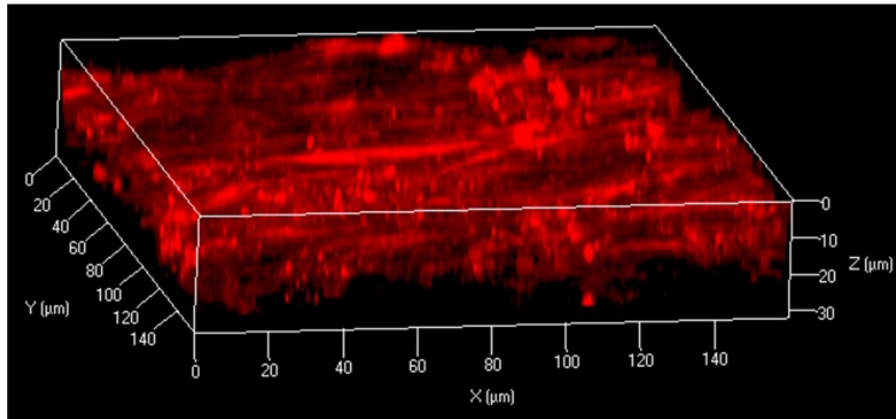

**Fig. S6.** Confocal microscopy-based three-dimensional visualization of F-actin (red) stained cells cultured on each film (*DF* and *MFLSS*).



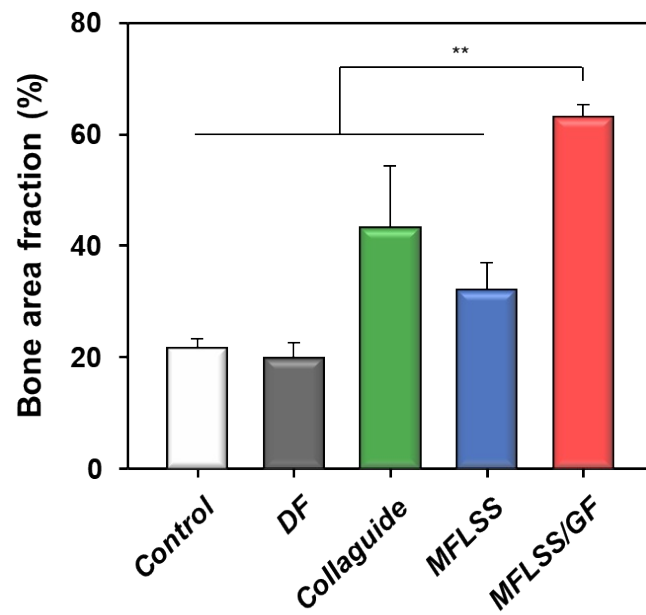

**Fig. S7.** Quantitative analysis of the new bone area fraction within rat calvarial defects at 8 weeks post-implantation. The bone area fraction was calculated from dorsal micro-CT images as the percentage of mineralized tissue within the predefined defect region of interest (ROI). Data are presented as mean  $\pm$  SD ( $n = 3$ ).  $**p < 0.01$ .

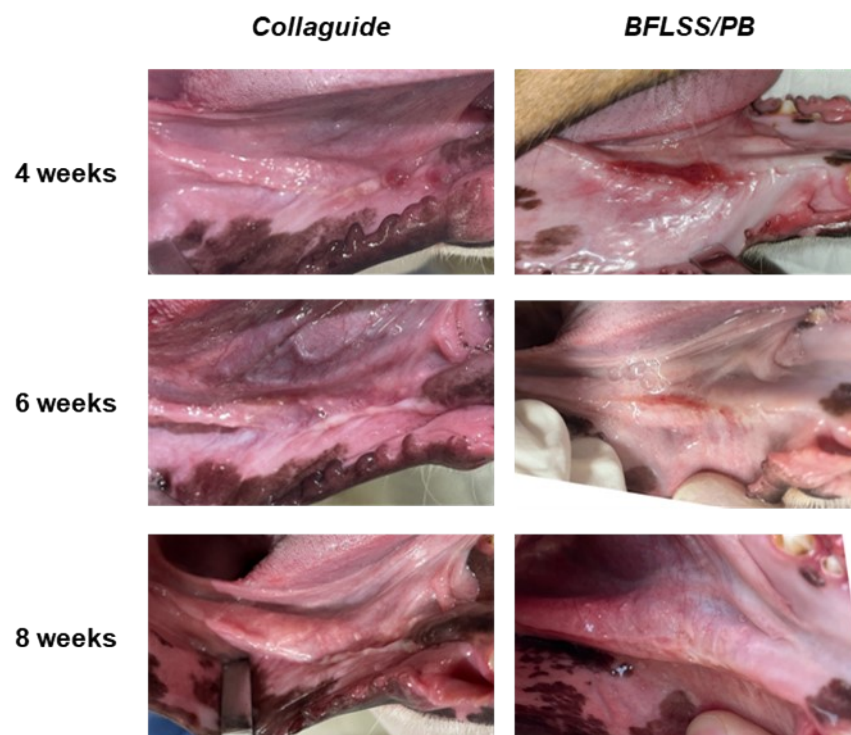

**Fig. S8.** Representative examples of epithelial healing following bone grafting with bone substitutes, *Collaguide*, and *MFLSS/GF*. Epithelial integrity was maintained without membrane exposure, a critical factor for optimal bone regeneration.
